# Supplementary material for: Bile Acids Are Substrates for Amine N-Acyl Transferase Activity by Bile Salt Hydrolase
Source: Research Square preprint supplement (doi:10.21203/rs.3.rs-2050120/v1), 2022-10-10
Supplement: Supplementary file 1 [file 86f44f1b15e4fb414608e85f.pdf]

Supplemental Figures:

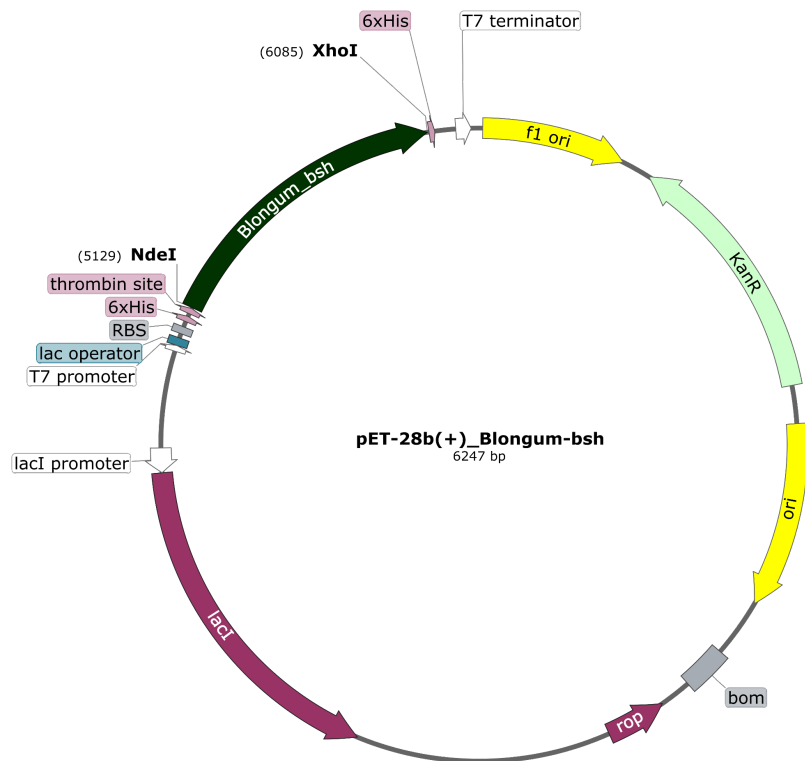

Supplemental Figure S1. Plasmid map of pET-28b(+)-BIBSH codon-optimized for *E. coli*.

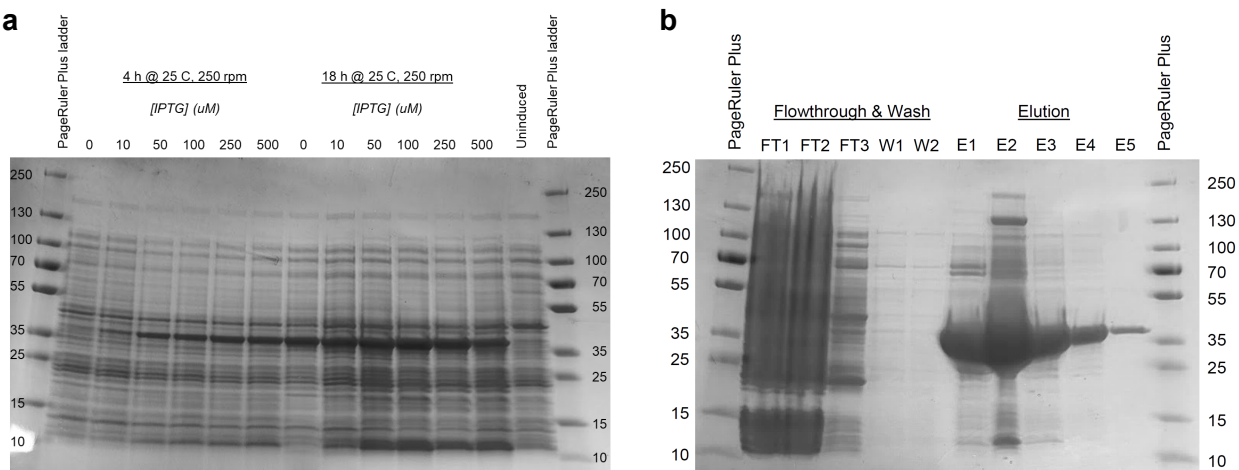

Supplemental Figure S2. Protein expression and purification of *Bifidobacterium longum* BSH in *E. coli* BL21(DE3). (a) SDS-PAGE of soluble protein fraction extracted from *E. coli* BL21(DE3) transformed with pET-28b(+)-BIBSH. (b) SDS-PAGE of total protein collected from stages throughout His-purification of *E. coli* pET-28b(+)-BIBSH extract.
